# Supplementary material
Source: MDPI journal article supplement (https://www.mdpi.com/2072-4292/10/11/1795)
Supplement: s1 [file s1]

## Supplemental Material

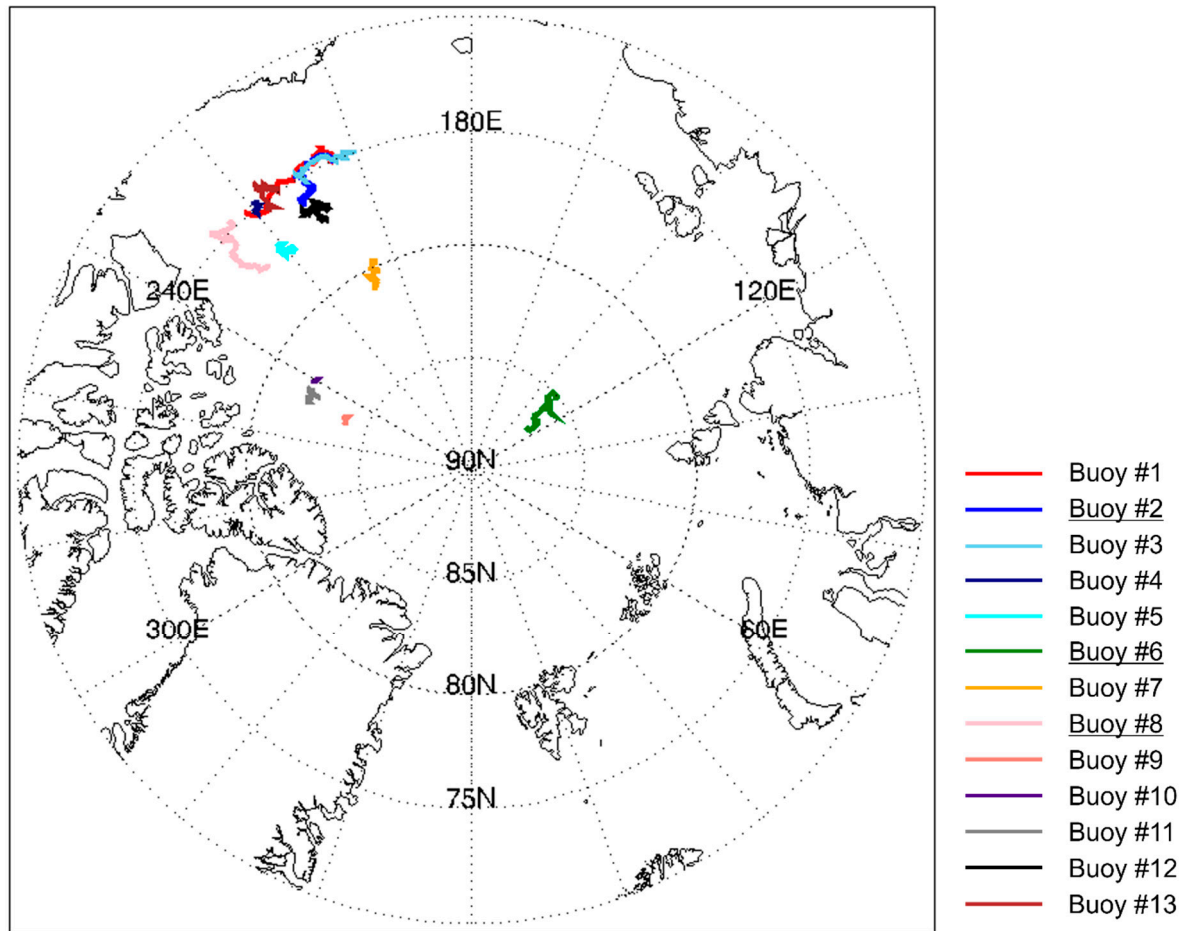

**Figure S1.** Tracks of the 13 selected buoys deployed in the Arctic sea. Colors indicate different buoy tracks, and numbers correspond to deployed buoys defined in Table 3. Three rejected buoys (#2, #6, and #8) are underlined in the labels.
